# Supplementary material
Source: PubMed Central journal article supplement (PMC4285980)
Supplement: JB.02382-14_zjb999093475so1.pdf [file JB.02382-14_zjb999093475so1.pdf]

# Figure S1

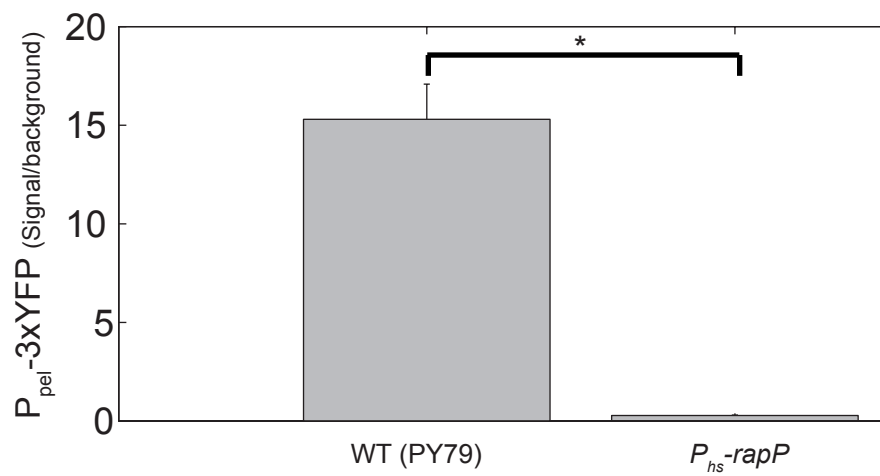

Figure S1: **RapP represses the pel promoter.** (a) Shown are the YFP expression levels of two strains carrying the  $P_{pel}$ -3xyfp reporter in the following backgrounds: wild-type PY79 (AES1418),  $P_{hs}$ -rapP (AES1445). All measurements were performed at an OD600 of one. The inducible promoter was induced with 10 $\mu$ M of IPTG.

# Figure S2

| #  | Protein GI number | Aligned Sequence |     |             | #   | Protein GI number | Aligned Sequence |     |            |
|----|-------------------|------------------|-----|-------------|-----|-------------------|------------------|-----|------------|
|    |                   | 226              | 236 | 246         |     |                   | 226              | 236 | 246        |
| 1  | 443344996         | lpltesfalf       | n   | lgvcferqkm  | 54  | 472329183         | ndrfiaisll       | n   | iansydrsgd |
| 2  | 443348859         | denllchayy       | n   | lgflkatekk  | 55  | 351469170         | ndrfiaisll       | n   | iansydrsgd |
| 3  | 384177276         | denllchayy       | n   | lgflkatekk  | 56  | 449093399         | ndrfiaisll       | n   | iansydrsgd |
| 4  | 472332020         | denllchayy       | n   | lgflkatekk  | 57  | 321314410         | ndrfiaisll       | n   | iansydrsgd |
| 5  | 428281256         | denllchayy       | n   | lgflkatekk  | 58  | 255767178         | ndrfiaisll       | n   | iansydrsgd |
| 6  | 430756569         | denllchayy       | n   | lgflkatekk  | 59  | 497652574         | ndrfiaisll       | n   | iansydrsgd |
| 7  | 16080691          | denllchayy       | n   | lgflkatekk  | 60  | 428278168         | ndrfiaisll       | n   | iansydrsgd |
| 8  | 321313185         | denllchayy       | n   | lgflkatekk  | 61  | 350267934         | qprligsaly       | n   | igncyddkge |
| 9  | 305676255         | ddnllchayy       | n   | lgflkatekk  | 62  | 443348902         | qprligsaly       | n   | igncyddkge |
| 10 | 296151383         | ddnllchayy       | n   | lgflkatekk  | 63  | 305676292         | qprligsaly       | n   | igncyddkge |
| 11 | 350267898         | denllchayy       | n   | lgflkatekk  | 64  | 384177312         | qprligsaly       | n   | igncyddkge |
| 12 | 16078951          | deflkaqlfh       | n   | lsivysdwnk  | 65  | 449096120         | qprligsaly       | n   | igncyddkge |
| 13 | 384175679         | deflkaqlfh       | n   | lsivysdwnk  | 66  | 428281290         | qprligsaly       | n   | igncyddkge |
| 14 | 443345550         | defleaqlyh       | n   | lsivysdwnk  | 67  | 430756535         | qprligsaly       | n   | igncyddkge |
| 15 | 428278738         | dkffeaqihh       | n   | lsitysaanr  | 68  | 16080722          | qprligsaly       | n   | igncyddkge |
| 16 | 305676690         | dhffeaqllh       | n   | fgllhaqsgk  | 69  | 443345493         | khkligasly       | n   | lgnicyymke |
| 17 | 296153004         | dhffeaqllh       | n   | fgllhaqsgk  | 70  | 443347386         | msrligssly       | n   | lglcyfaeea |
| 18 | 350268321         | dhffeaqllh       | n   | fgllhaqsgk  | 71  | 50346533          | kaqlvgrayy       | n   | lglcyynqel |
| 19 | 443349311         | dhffeaqllh       | n   | fgllhaqsgk  | 72  | 443346068         | kaqlvgrayy       | n   | lglcyynqel |
| 20 | 430757872         | dhffeaqllh       | n   | fgllhaqsgk  | 73  | 50346536          | kaqlvgrayy       | n   | lglcyynqel |
| 21 | 384177691         | dhffeaqllh       | n   | fgllhaqsgk  | 74  | 321314047         | kaqlvgrayy       | n   | lglcyynqdl |
| 22 | 428281704         | dhffeaqllh       | n   | fgllhaqsgk  | 75  | 50363103          | kaqlvgrayy       | n   | lglcyynqdl |
| 23 | 16081082          | dhffeaqllh       | n   | fgllhaqsgk  | 76  | 16077445          | kaqlvgrayy       | n   | lglcyynqdl |
| 24 | 351471787         | dhffeaqllh       | n   | fgllhaqsgk  | 77  | 449093073         | kaqlvgrayy       | n   | lglcyynqdl |
| 25 | 1305514           | hdyittkgl1       | n   | lgnfcnkqdd  | 78  | 351468784         | kaqlvgrayy       | n   | lglcyynqdl |
| 26 | 10956495          | nkymlakall       | n   | lgdsyknmgd  | 79  | 402774618         | kaqlvgrayy       | n   | lglcyynqdl |
| 27 | 10956510          | hsp1kakall       | n   | mgnsynqmg   | 80  | 430758593         | kaqlvgrayy       | n   | lglcyynqdl |
| 28 | 321314404         | nkriyqgalf       | n   | lgnicylkmge | 81  | 350264625         | kaqlvgrayy       | n   | lglcyynqdl |
| 29 | 443346532         | nkriyqgalf       | n   | lgnicylkmge | 82  | 305673084         | kaqlvgrayy       | n   | lglcyynqdl |
| 30 | 321312077         | nthyataaff       | n   | lgnicyhkmdn | 83  | 350268020         | qpqlmgtly        | n   | lglcknsqsq |
| 31 | 255767596         | nthyataaff       | n   | lgnicyhkmdn | 84  | 449096201         | qpqlmgtly        | n   | lglcknsqsq |
| 32 | 351471102         | nthyataaff       | n   | lgnicyhkmdn | 85  | 472332133         | qpqlmgtly        | n   | lglcknsqsq |
| 33 | 1217880           | nthyataaff       | n   | lgnicyhkmdn | 86  | 430755657         | qpqlmgtly        | n   | lglcknsqsq |
| 34 | 350266788         | nthyataaff       | n   | lgnicyhkmdn | 87  | 321313296         | qpqlmgtly        | n   | lglcknsqsq |
| 35 | 321314985         | nprlissaly       | n   | lgnicykmge  | 88  | 428281376         | qpqlmgtly        | n   | lglcknsqsq |
| 36 | 407964200         | nprlissaly       | n   | lgnicykmge  | 89  | 16080798          | qpqlmgtly        | n   | lglcknsqsq |
| 37 | 407956931         | nprlissaly       | n   | lgnicykmge  | 90  | 384177394         | qpqlmgtly        | n   | lglcknsqsq |
| 38 | 39931             | nprlissaly       | n   | lgnicykmge  | 91  | 305676373         | qpqlmgtly        | n   | lglcknsqsq |
| 39 | 305673952         | nprlissaly       | n   | lgnicykmge  | 92  | 443348987         | qpqlmgtly        | n   | lglcknsqsq |
| 40 | 430755744         | nprlissaly       | n   | lgnicykmge  | 93  | 321313952         | eaymiaaayy       | n   | vghckyslgd |
| 41 | 16078308          | nprlissaly       | n   | lgnicykmge  | 94  | 449092977         | eaymiaaayy       | n   | vghckyslgd |
| 42 | 449093941         | nprlissaly       | n   | lgnicykmge  | 95  | 351468559         | eaymiaaayy       | n   | vghckyslgd |
| 43 | 443346866         | nprlissaly       | n   | lgnicykmge  | 96  | 384173932         | eaymiaaayy       | n   | vghckyslgd |
| 44 | 350264321         | hdr1issaly       | n   | lgecyhymgq  | 97  | 16077351          | eaymiaaayy       | n   | vghckyslgd |
| 45 | 384176217         | nkr1issaly       | n   | lgtnfadsgd  | 98  | 350264524         | eaymiaaahy       | n   | vghckyslgd |
| 46 | 472330992         | nkr1issaly       | n   | lgtnfadsgd  | 99  | 305672983         | eaymiaaahy       | n   | vghckyslgd |
| 47 | 428280076         | nkr1issaly       | n   | lgtnfadsgd  | 100 | 443345670         | eaymiaaahy       | n   | vghckyslgd |
| 48 | 443348016         | nkr1issaly       | n   | lgtnfadsgd  | 101 | 16077568          | ieh1iamshm       | n   | igicydelke |
| 49 | 430756340         | nkr1issaly       | n   | lgtnfadsgd  | 102 | 428277959         | ieh1iamshm       | n   | igicydelke |
| 50 | 305673899         | nkr1issaly       | n   | lgtnfadrgd  | 103 | 443346203         | ieh1iamshm       | n   | igicydelke |
| 51 | 443346524         | ndrfiaisll       | n   | iansydrsgd  | 104 | 428278423         | idyligmahi       | n   | igicfdelkd |
| 52 | 305673386         | ndrfiaisll       | n   | iansydrsgd  | 105 | 323651054         | eqh1igsahf       | n   | vglcynnlee |
| 53 | 430757219         | ndrfiaisll       | n   | iansydrsgd  | 106 | 350265475         | eqh1igsahf       | n   | vglcynnlee |
|    |                   |                  |     |             | 107 | 323651061         | ydkpitkiyh       | n   | lglvhwqkgs |

Figure S2: Alignment of 107 Rap genes of *B. subtilis* strains show perfect conservation of the RapP asparagine residue in position 236. Using Blast, 107 sequences of Rap proteins of *B. subtilis* strains that show a difference in amino-acid sequence were identified and aligned. Shown are the alignment results for the region corresponding to amino-acids 226-246 of RapP<sup>3610</sup>. Each protein sequence is marked by its NCBI GI number. Note that RapP<sup>3610</sup> is not shown. Residue 236 is specifically emphasized by spaces on both sides. The asparagine in this residue is 100% conserved.

# Figure S3

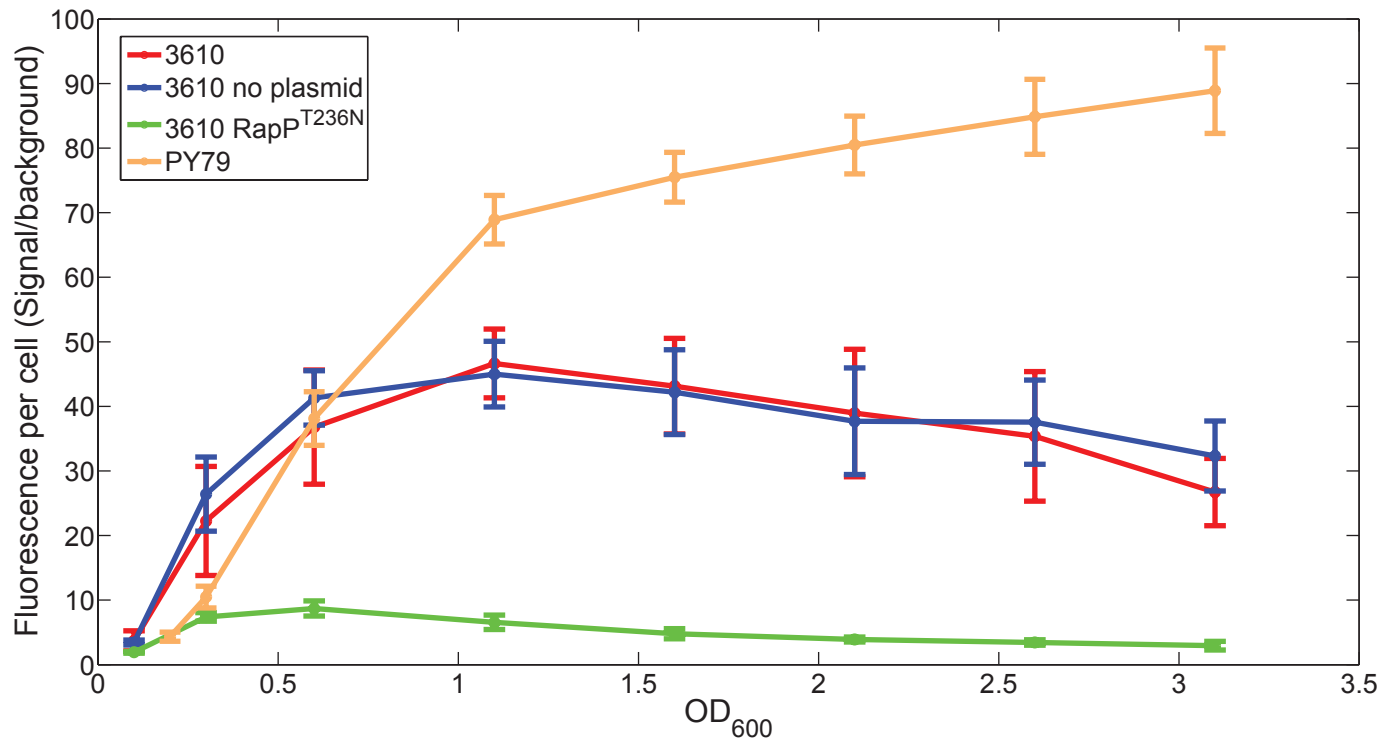

Figure S3:  $P_{srfA}$ -3xyfp expression as a function of time for strain 3610 derivatives and strain PY79. YFP expression levels of  $P_{srfA}$ -3xYFP as a function of optical density during growth in SMM for the following backgrounds: 3610;plasmid free strain (AES1605, blue), 3610;*rap*<sup>PT236N</sup>-*phrP* strain (AES1873, green), strain 3610 (3610;*rap*<sup>P3610</sup>-*phrP*, AES1336, red) and strain PY79 (AES1334, orange).
